# Supplementary material
Source: MDPI journal article supplement (https://www.mdpi.com/2673-9976/6/1/84)
Supplement: s1 [file s1]

# Olive leaf extracts as a source of antibacterial compounds against *Campylobacter* spp. strains isolated from the chicken food chain

## INTRODUCTION

*Campylobacter* is the leading cause of bacterial foodborne gastroenteritis worldwide. Infections by *Campylobacter* in humans are generally caused by consuming contaminated foods of animal origin, with poultry, especially chicken, being the main reservoir. The high prevalence of *Campylobacter* in chicken carcasses and the growing resistance to the most widely used antibiotics has driven EFSA to propose a regulation (Regulation EU N° 2017/1495) containing new microbiological criteria to regulate the presence of *Campylobacter* in broiler carcasses ( $\leq 1,000$  cfu/g). In this context, there has been an increase in the number of research aimed at the search for new tools to reduce *Campylobacter* incidence in chicken meat. The objective of the present work was to evaluate the antibacterial activity of two olive leaf extracts (OLE1 and OLE2) against eleven *Campylobacter* spp. strains (*C. jejuni* y *C. coli*) isolated from chicken food chain.

## MATERIALS & METHODS

### Preparation of Olive Leaf Extracts (OLEs)

- ✓ Drying olive leaves at 50°C for 30 min. (cabinet hot-air drier)
- ✓ Milling dried olive leaves in a grinder
- ✓ Extractions:

- Aqueous extraction (60°C) → OLE1
- Methanol extraction (40°C) → OLE2

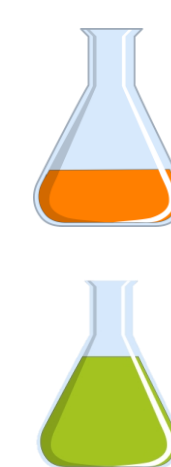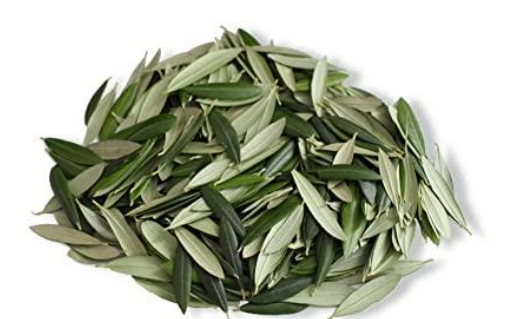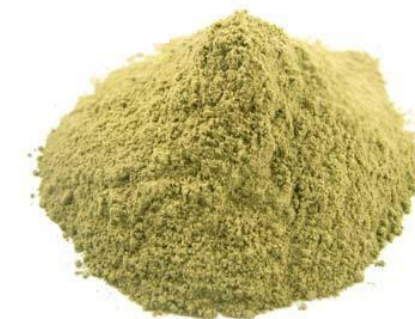

- ✓ Evaporation and freeze-drying of extracts

### Phenolic composition of OLEs

- ✓ Analysis of phenolic compounds was performed by HPLC (Silvan et al., 2020)

### Bacterial strains, growth media and culture conditions

- ✓ Eleven *Campylobacter* strains isolated from different points of the chicken food chain were used:

| Species              | Strain references                |
|----------------------|----------------------------------|
| <i>C. jejuni</i> (7) | 48, 222, 231, 262, 291, 321, 360 |
| <i>C. coli</i> (4)   | 209, 270, 279, 577               |

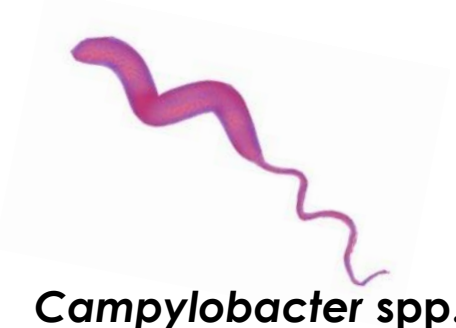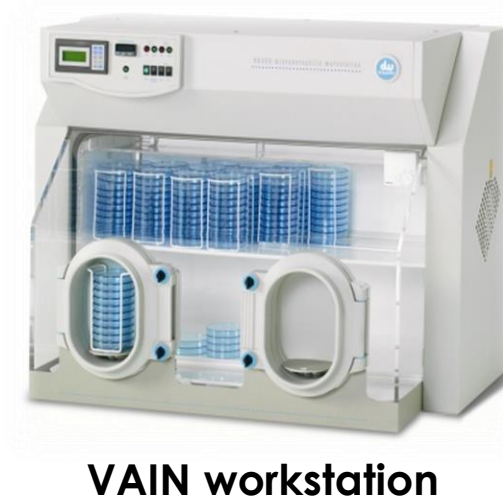

- ✓ Selective growth media: Brucella Broth (BB) and Mueller-Hinton agar supplemented with 5% sheep blood (MHB)
- ✓ Growth conditions: strains reactivation into MHB and incubation for 48 h at 40°C, in microaerophilic atmosphere in VAIN workstation (85% N<sub>2</sub>, 10% CO<sub>2</sub>, 5% O<sub>2</sub>)

### Determination of antibiotic susceptibility

- ✓ Antibiotic susceptibility was performed by the E-test (Silvan et al., 2021)
- ✓ Eight antibiotics were used:

- Erythromycin (ERY)
- Doxycycline (DOX)
- Ciprofloxacin (CIP)
- Nalidixic acid (NAL)
- Amoxicillin (AMX)
- Amoxicillin-clavulanic acid (AMX-CLA)
- Gentamicin (GEN)
- Tetracycline (TET)

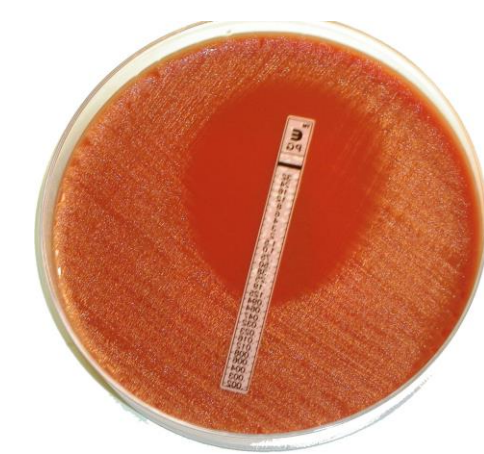

### Antibacterial activity

- ✓ Procedure:

- 1 mL of extracts (2 mg/mL) dissolved in BB (or BB for control growth)
- 4 mL BB
- 100 µL bacterial inoculum ( $\sim 1 \times 10^8$  CFU/mL)
- Incubation for 24 h at 40°C, 150 rpm, in microaerophilic atmosphere (VAIN)
- Serial decimal dilutions of mixtures were plated onto fresh MHB agar
- Incubation microaerobically for 72 h at 40°C in microaerophilic atmosphere (VAIN)
- Antibacterial activity determination by CFU counting

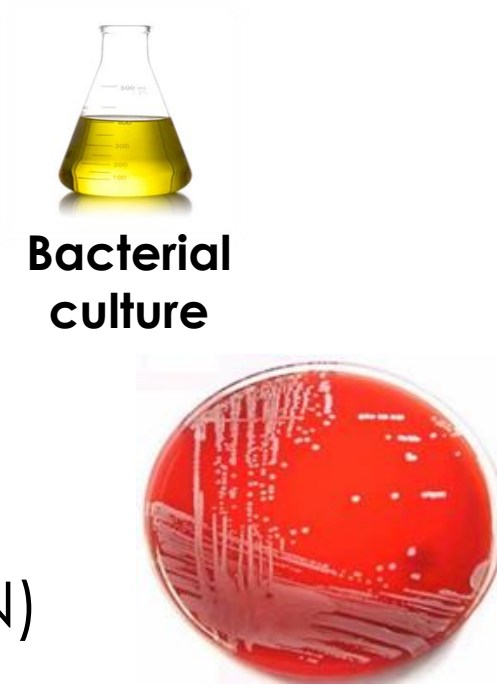

## CONCLUSIONS

- The analytical method used in the present work made it possible to identify hydroxytyrosol as the major phenolic compound present in OLE1; and oleuropein as the main phenolic compound present in OLE2.
- The studied strains of *C. jejuni* and *C. coli* isolated from the chicken food chain showed a high rate of resistance ( $\geq 50\%$ ) to the most commonly antibiotics used for campylobacteriosis treatment.
- However, some of the antibiotics evaluated in this study, such as ERY, AMX-CLA and GEN, showed 100% efficacy against *C. jejuni* and *C. coli* strains.
- Both extracts, OLE1 and OLE2, showed antibacterial activity against *Campylobacter* strains and this activity was strain-dependent.
- OLE1 completely inhibited the bacterial growth of two *C. jejuni* strains (48 and 231 strains) and all *C. coli* strains following a 24h exposure to 2 mg/mL, suggesting a broad antibacterial activity.
- OLE2 showed moderate antibacterial activity (after 24h at 2 mg/mL) against seven of the eleven (7/11) tested strains (48, 231, 262, 360, 270, 577, and 209) reducing 1-2 log CFU/mL the bacterial growth compared with the controls growth.
- OLEs could be consider as a potential source of bioactive compounds used as alternative for *Campylobacter* control at different stages of the chicken food chain, and would be an interesting tool to produce extracts capable of reducing the incidence of *Campylobacter* spp. in broiler chickens and thus comply with the new regulation.
- Furthermore, the recycling of olive industry by-products could also contribute to its revalorization, reducing also the environmental impact.

## RESULTS

### Identification of olive leaves phenolic compounds

Table 1. Main phenolic compounds identified from olive leaf extracts by HPLC.

| OLE1                     | Retention time | OLE2                  | Retention time |
|--------------------------|----------------|-----------------------|----------------|
| Hydroxytyrosol           | 18 min         | Lueolin-7-O-glucoside | 75 min         |
| Hydroxytyrosol-glucoside | 21.5 min       | Verbascoside          | 76 min         |
| Tyrosol                  | 27.5 min       | Oleuropein            | 93.7 min       |
| Tyrosol-glucoside        | 35 min         |                       |                |
| Lueolin-7-O-glucoside    | 75 min         |                       |                |

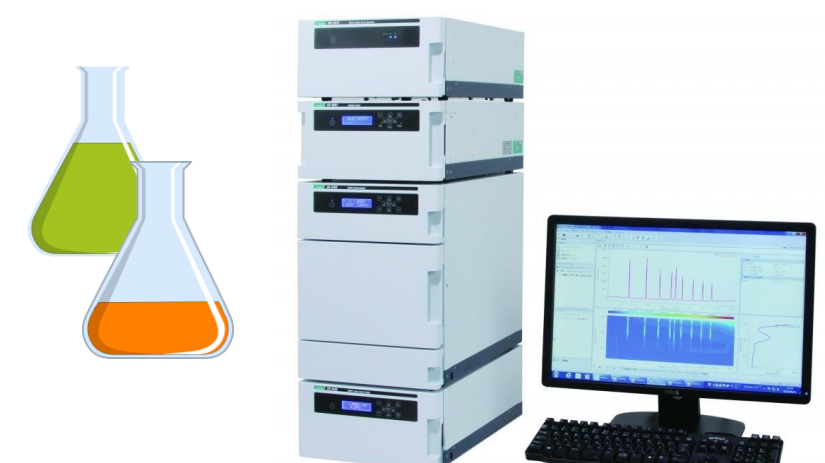

### Antibiotic susceptibility

Table 2. Antibiotic resistance and MIC profile of *Campylobacter* spp. strains.

| Specie            | Ref. strain | ERY       | TET          | DOX          | CIP          | NAL          | AMX          | AMX-CLA   | GEN       | Rate of resistance |
|-------------------|-------------|-----------|--------------|--------------|--------------|--------------|--------------|-----------|-----------|--------------------|
| <i>C. jejuni</i>  | 48          | S (0.5)   | R (32)       | R (48)       | R (>32)      | R (>256)     | I (16)       | S (0.5)   | S (0.25)  | 4/8 (50%)          |
|                   | 231         | S (0.5)   | R (32)       | R (48)       | R (>32)      | R (>256)     | R (32)       | S (0.5)   | S (0.38)  | 5/8 (62.5%)        |
|                   | 262         | S (0.5)   | R (>256)     | R (>256)     | R (>32)      | R (>256)     | R (>256)     | S (0.38)  | S (0.19)  | 5/8 (62.5%)        |
|                   | 222         | S (0.5)   | R (>256)     | R (>256)     | R (>32)      | R (>256)     | R (>256)     | S (0.25)  | S (0.19)  | 5/8 (62.5%)        |
|                   | 321         | S (0.38)  | R (128)      | R (>256)     | R (>32)      | R (>256)     | R (>256)     | S (0.19)  | S (0.38)  | 5/8 (62.5%)        |
|                   | 291         | S (0.75)  | R (>256)     | R (>256)     | R (>32)      | R (>256)     | R (96)       | S (0.25)  | S (0.25)  | 5/8 (62.5%)        |
|                   | 360         | S (0.38)  | R (24)       | R (32)       | R (>32)      | R (>256)     | R (24)       | S (0.25)  | S (0.125) | 5/8 (62.5%)        |
| <i>C. coli</i>    | 279         | S (0.5)   | R (3)        | R (12)       | R (>32)      | R (>256)     | S (2)        | S (0.5)   | S (0.5)   | 4/8 (50%)          |
|                   | 209         | S (0.75)  | R (32)       | R (8)        | R (>32)      | R (>256)     | S (3)        | S (1)     | S (0.75)  | 4/8 (50%)          |
|                   | 577         | S (2)     | R (>256)     | R (>256)     | R (>32)      | R (>256)     | I (8)        | S (0.75)  | S (0.5)   | 4/8 (62.5%)        |
|                   | 270         | S (1)     | R (>256)     | R (>256)     | R (>32)      | R (>256)     | I (6)        | S (1)     | S (0.5)   | 4/8 (50%)          |
| Resistant strains |             | 0/11 (0%) | 11/11 (100%) | 11/11 (100%) | 11/11 (100%) | 11/11 (100%) | 6/11 (46.2%) | 0/11 (0%) | 0/11 (0%) |                    |

The breakpoints were defined following the European Committee on Antimicrobial Susceptibility Testing (EUCAST) guidelines (v11.0) and French Society of Microbiology. R: Resistant; S: sensitive; I: intermediate.

### Antibacterial activity against *Campylobacter* strains

Table 3. Antibacterial activity of OLEs on the viable counts of different *Campylobacter* spp. strains after 24h of treatment at 2 mg/mL. Results are expressed as log CFU/mL  $\pm$  SD deviation (n=4).

| Species          | Ref. strain | Control growth          | OLE1                    | OLE2                    |
|------------------|-------------|-------------------------|-------------------------|-------------------------|
| <i>C. jejuni</i> | 48          | 9.62 <sup>a</sup> ±0.04 | 1.48 <sup>b</sup> ±0.00 | 8.13 <sup>c</sup> ±0.09 |
|                  | 231         | 8.63 <sup>a</sup> ±0.03 | 1.48 <sup>b</sup> ±0.00 | 6.98 <sup>c</sup> ±0.09 |
|                  | 262         | 8.50 <sup>a</sup> ±0.06 | 2.67 <sup>b</sup> ±0.14 | 6.86 <sup>c</sup> ±0.10 |
|                  | 222         | 9.21 <sup>a</sup> ±0.07 | 8.58 <sup>a</sup> ±0.05 | 9.39 <sup>a</sup> ±0.05 |
|                  | 291         | 9.37 <sup>a</sup> ±0.06 | 8.93 <sup>a</sup> ±0.11 | 9.40 <sup>a</sup> ±0.06 |
|                  | 321         | 8.92 <sup>a</sup> ±0.08 | 9.14 <sup>a</sup> ±0.07 | 9.24 <sup>a</sup> ±0.04 |
|                  | 360         | 9.31 <sup>a</sup> ±0.06 | 3.99 <sup>b</sup> ±0.04 | 8.08 <sup>c</sup> ±0.04 |
| <i>C. coli</i>   | 270         | 8.64 <sup>a</sup> ±0.03 | 1.48 <sup>b</sup> ±0.00 | 6.69 <sup>c</sup> ±0.02 |
|                  | 577         | 9.32 <sup>a</sup> ±0.05 | 1.48 <sup>b</sup> ±0.00 | 6.83 <sup>c</sup> ±0.06 |
|                  | 279         | 9.47 <sup>a</sup> ±0.04 | 1.48 <sup>b</sup> ±0.00 | 9.78 <sup>a</sup> ±0.03 |
|                  | 209         | 9.16 <sup>a</sup> ±0.09 | 1.48 <sup>b</sup> ±0.00 | 8.01 <sup>c</sup> ±0.07 |

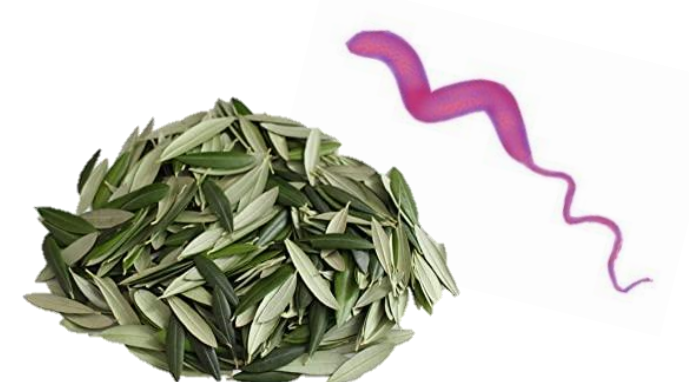

a, b, c values of CFU/mL in the same row marked with different letters indicate significant differences by ANOVA post hoc LSD Tukey test (p<0.05).

\* Colony forming unit (CFU), detection limit was 1.48 log CFU/mL (30 CFU per plate).
